# Supplementary material
Source: MDPI journal article supplement (https://www.mdpi.com/2227-9717/3/3/634)
Supplement: s1 [file s1]

## Supporting Information

Author supplied and index keywords for articles published between 2000 to present are downloaded from SCOPUS database [1]. Primarily, author supplied keywords are used for analysis, and indexed keywords are used as a substitution in absence of author supplied keywords. A bibliometric analysis software—Vosviewer was used to identify the relevant keywords by selecting keywords with at least 10 minimum numbers of occurrences [2]. Further manual processing was done to remove irrelevant terms not removed by Vosviewer. Additionally, a thesaurus file was created to aggregate identified keywords to pre-defined topics. The thesaurus file also contained VOSviewer identified plurals and singular forms and abbreviations of the same word to prevent double counting. For example, keywords life cycle assessment, LCA and life cycle analysis were replaced by topic life cycle assessment.

Table S1 includes the comprehensive list of Vosviewer identified relevant keywords with their substitution topic areas. The co-occurrence data is mapped through a network software ORA [3].

**Table S1.** Aggregation scheme for author supplied and indexed keywords with their topic areas and general theme.

| Theme                           | Topic                  | List of Keywords                                                                                                                                                                                                                                                                                 |
|---------------------------------|------------------------|--------------------------------------------------------------------------------------------------------------------------------------------------------------------------------------------------------------------------------------------------------------------------------------------------|
| Environmental & Human Wellbeing | Food Security          | Food Supply, food crop, grain crop, food, food industry.                                                                                                                                                                                                                                         |
|                                 | Human Health           | Mortality, asthma, human health, allergens, lung, children, cancer, mutagens, mortality, exposure, toxicity, female, male, health risk, adult.                                                                                                                                                   |
|                                 | GHGs                   | Carbon dioxide, climate change, CO <sub>2</sub> , methane, CH <sub>4</sub> , nitrous oxide, N <sub>2</sub> O, global warming, emissions, radiative forcing, greenhouse gas, greenhouse gases, GHGs, GHG, carbon emissions, carbon, carbon footprint, GWP, greenhouse gas emission, ghg emission. |
|                                 | Air Quality (Non-GHGs) | Particulate matter, Volatile organic compounds, PM, particulate matter, PM <sub>10</sub> , SO <sub>x</sub> , sulfur oxides, NO <sub>x</sub> , nitrogen oxides, carbon monoxide, smog, dust, NH <sub>3</sub> , air pollutants, air pollutant, atmospheric pollution, air pollution, air quality.  |
|                                 | Soil Resources         | Soil organic carbon, soil fertility, soil erosion, soil organic matter.                                                                                                                                                                                                                          |
|                                 | Land Use Change        | Indirect land use change, direct land use change, land use change, land, deforestation, habitat, wetland, grassland, prairie, pasture, forest, landscape.                                                                                                                                        |
|                                 | Water Resources        | Groundwater, water footprint, water, wastewater, runoff, sediment, alkalinity, eutrophication, ocean.                                                                                                                                                                                            |
|                                 | Biodiversity           | Wildlife, biodiversity, richness, pollinators, insects, animals, bird                                                                                                                                                                                                                            |

Table S1. *Cont.*

| Theme                                                 | Topic                                | List of Keywords                                                                                                                                                                                                                                                                                                                                                                                                                                                                      |
|-------------------------------------------------------|--------------------------------------|---------------------------------------------------------------------------------------------------------------------------------------------------------------------------------------------------------------------------------------------------------------------------------------------------------------------------------------------------------------------------------------------------------------------------------------------------------------------------------------|
| Environmental & Human Wellbeing                       | Life Cycle Assessment                | Life cycle analysis, life cycle assessment, LCA, environmental life cycle assessment, life cycle assessment (LCA), life cycle analysis, life cycle, environmental sustainability, environmental impact, environmental impacts.                                                                                                                                                                                                                                                        |
|                                                       | Ecosystem Services                   | Ecosystem services, ecosystems, ecosystem                                                                                                                                                                                                                                                                                                                                                                                                                                             |
| Economy                                               | Cost of Production                   | Technoeconomic analysis, infrastructure, cost, costs, capital, investment, investments, financing, infrastructure, labor, research and development, utilities, expense, commercialization, viability, economics, industrial economics, environmental economics, agricultural economics, break-even price, economic analysis, economic impact, techno-economic assessment, techno-economic, technoeconomic analysis, technoeconomic evaluation, technoeconomics, economic development. |
|                                                       | Market Forces                        | Supply and demand, cost competitiveness, market, price                                                                                                                                                                                                                                                                                                                                                                                                                                |
|                                                       | Policy                               | RFS2, EISA, LCFS, policy, law, legislation, laws, tax, taxation, incentive, low carbon fuel standards, subsidy, performance standards, energy security, energy independence, biotechnology policy, policy making, energy policy, biofuels policy, environmental policy, policy analysis, pricing policy, policy guidelines, pollution policy, policy making, regulation, decision makers, biofuels mandate, renewable fuel, biofuel mandates, decision making, agricultural policy.   |
|                                                       | Trade                                | Import, trade, export, tariff                                                                                                                                                                                                                                                                                                                                                                                                                                                         |
| Production Distribution, Technology, & Infrastructure | Feedstock Production and Agronomics  | Biomass production, agronomics, agronomy, planting, tillage, biomass production, cultivation, fertilizer, pesticides, herbicides, irrigation, tillage, crop rotation, bioreactor, open raceway pond, photobioreactor, agriculture management, establishment, coppice, intensification, yield, monoculture, breeding.                                                                                                                                                                  |
|                                                       | Feedstock Logistics                  | Pretreatment, biomass transportation, chipping, harvest, harvesting, biomass transportation, felling, flocculation, dewatering, pretreatment, pre-treatment.                                                                                                                                                                                                                                                                                                                          |
|                                                       | Fuel Distribution and Infrastructure | Pipeline, fuel storage, distribution, shipping, fuel storage, storage tank, flexible-fuel vehicle, FFV, blend, viscosity, engine, corrosion, B20, E85, E10, E15, B100                                                                                                                                                                                                                                                                                                                 |
| Biofuels                                              | Aviation Fuel                        | Aviation fuel, jet fuel, aviation fuels, jet fuels                                                                                                                                                                                                                                                                                                                                                                                                                                    |

Table S1. Cont.

| Theme                | Topic                | List of Keywords                                                                                                                                                                                                        |
|----------------------|----------------------|-------------------------------------------------------------------------------------------------------------------------------------------------------------------------------------------------------------------------|
| Biofuels             | Biodiesel            | Biodiesel, biodiesel blend, biodiesel resources, biodiesel products, biodiesel fuel, biodiesel plants, biodiesel blend                                                                                                  |
|                      | Ethanol              | Ethanol, lignocellulosic ethanol, bio ethanol, corn ethanol, fermentation, fuel ethanol, ethanol productivity, cellulosic ethanol, bioethanol, ethanol alcohol, ethanol production, ethanol fuel, ethanol blend         |
|                      | Hydrocarbon Biofuel  | Drop in replacement biofuel, renewable diesel, drop-in replacement biofuels, green diesel                                                                                                                               |
|                      | Butanol              | Butanol, biobutanol                                                                                                                                                                                                     |
|                      | Biogas               | Biogas, biomethane                                                                                                                                                                                                      |
| Conversion Platforms | Pyrolysis            | Fast pyrolysis, pyrolysis oil, bio-oil, pyrolytic oil, pyrolysis, temperature, catalytic pyrolysis, pyrolysis product, fast pyrolysis, torrefaction                                                                     |
|                      | Gasification         | Gasification, BTL, Fischer tropesch, synthesis gas, syngas                                                                                                                                                              |
|                      | Transesterification  | Esterification, FAME, fatty acid methyl esters, esterification, fatty acids, methyl esters, methyl ester, tryglycerol                                                                                                   |
|                      | Hydrolysis           | Hydrolysis, fermentation, yeast, <i>Saccharomyces cerevisiae</i> , saccharification, sugars, hydrolysis, enzymatic hydrolysis, dark fermentation, simultaneous saccharification, metabolism                             |
|                      | Anaerobic Digestion  | Anaerobic digestion                                                                                                                                                                                                     |
| Feedstocks           | Woody Biomass        | Willow, poplar, wood fuel, woodfibers, wood, wood products, timber, timber markets, logging, wood wastes, wood management, wood thinning, softwood, wood chip, hardwood, wood pellets, wood pellet, oak, forest biomass |
|                      | Perennial Grasses    | Switchgrass, <i>Miscanthus</i> , sweet sorghum, sorghum                                                                                                                                                                 |
|                      | Oil Seeds            | <i>Jatropha</i> , soybean, rapeseed, <i>Jatropha</i> oil, <i>Jatropha curcas</i> , soybean oil, soybean, sunflower, rapeseed oil, sunflower oil, palm oil, oilseed, oilseeds, oil seed, rapeseed methyl ester           |
|                      | Algae                | Microalgae, macroalgae, chlorella, <i>chlorella vulgaris</i> , macro algae, macroalgae, micro algae, algal biomass, algal biofuel, microalga, alga, macro-algae                                                         |
|                      | Agricultural Residue | Sugarcane bagasse, corn stover, forest residue, bagasse, sorghum bagasse, crop residue, agricultural waste, corn stover, wheat straw, forest residue, anaerobic digestion                                               |

Table S1. *Cont.*

| Theme          | Topic                        | List of Keywords                                                                                                  |
|----------------|------------------------------|-------------------------------------------------------------------------------------------------------------------|
| Feedstocks     | Industrial & Municipal Waste | Waste cooking oil, vegetable oil, industrial waste, municipal solid waste, waste oil                              |
|                | Grains & Sugar Crops         | Corn, wheat, rye, sugar cane, zea mays, maize, zea may                                                            |
| Thermodynamics | N/A                          | Exergy, emergy, thermodynamics, exergetic efficiency, exergy analysis, emergy analysis, thermodynamic efficiency. |

### References

1. Ballew, B.S. Elsevier's Scopus<sup>®</sup> Database. *J. Electron. Resour. Med. Libr.* **2009**, *6*, 245–252.
2. Dewulf, J.; van Langenhove, H.; Muys, B.; Bruers, S.; Bakshi, B. R.; Grubb, G. F.; Paulus, D. M.; Sciubba, E. Exergy: Its potential and limitations in environmental science and technology. *Environ. Sci. Technol.* **2008**, *42*, 2221–2232.
3. Carley, K.; Pfeffer, J.; Reminga, J. *ORA User's Guide 2013*; Institute for Software Research, School of Computer Science, Carnegie Mellon University: Pittsburgh, PA, USA, 2013.
